# Supplementary material for: Fabrication of bulk superhydrophobic wood by grafting porous poly(divinylbenzene) to wood structure using isocyanatoethyl methacrylate
Source: Royal Society of Chemistry journal article supplement (doi:10.1039/d4ra00889h), 2024-01-01
Supplement: d4ra00889h1.pdf [file d4ra00889h1.pdf]

## Supporting Information

### **Fabrication of bulk superhydrophobic wood by grafting porous poly(divinylbenzene) to wood structure using isocyanatoethyl methacrylate**

Xinyu Fang<sup>a</sup>, Ruijia Liao<sup>a</sup>, Kaiji Wang<sup>b</sup>, Miao Zheng<sup>a</sup>, Hongji Li<sup>a</sup>, Rui Wang<sup>a</sup>, Xiaorong Liu<sup>a</sup>, Youming Dong<sup>a</sup>, Kaili Wang<sup>a\*</sup>, Jianzhang Li<sup>a, c\*</sup>

<sup>a</sup>Co-Innovation Center of Efficient Processing and Utilization of Forest Resources, College of Materials Science and Engineering, Nanjing Forestry University, No.159 Longpan Road, Nanjing 210037, China..

<sup>b</sup>Tengzhou Tostar Power Electronic Engineering Co. Ltd, Zaozhuang 277000, China.

<sup>c</sup>MOE Key Laboratory of Wooden Material Science and Application, Beijing Forestry University, No.35 Tsinghua East Road, Beijing 100083, China.

**Table S1.** The comparison of superhydrophobic wood in this work and previous studies.

| Specimen          | Method                                                                                             | CA (°) | RA (°) | Abrasion resistance                                                      | Bulk or coating | Ref. |
|-------------------|----------------------------------------------------------------------------------------------------|--------|--------|--------------------------------------------------------------------------|-----------------|------|
| Chinese fir       | SiO <sub>2</sub> NPs modified by VTES                                                              | 154    | 0      | From 155° decreased to 151° with the sandpaper abrasion length of 1.2 m  | Coating         | 1    |
| Chinese fir       | Alkali-driven SiO <sub>2</sub> NPs modified by VTES                                                | 157    | 2      | From 157° decreased to 150° with the sandpaper abrasion length of 270 cm | Coating         | 2    |
| Larch wood        | Hydrothermal pre-treatment and deposit ZnO nanostructures                                          | 160    | 4      | From 160° decreased to 140° with the sandpaper abrasion length of 50 cm  | Coating         | 3    |
| Masson pine wood  | Hierarchical core/shell structures fabricated by Cu <sub>2</sub> O NPs, PF resin, and stearic acid | 153    | -      | From 153° decreased to 100° with the sandpaper abrasion length of 100 cm | Coating         | 4    |
| Radiata pine wood | ZIF-8/paraffin with Hexadecyltrimethoxysilane                                                      | 153    | -      | From 153° decreased to 150° with the sandpaper abrasion length of 100 cm | Coating         | 5    |
| Pinus wood        | Epoxy/Cu <sub>2</sub> (OH) <sub>3</sub> Cl NPs/stearic acid                                        | 157    | 9      | From 157° decreased to 130° with the sandpaper abrasion                  | Coating         | 6    |

|                   |                                                         |     |   |                                                                          |                         |           |
|-------------------|---------------------------------------------------------|-----|---|--------------------------------------------------------------------------|-------------------------|-----------|
|                   |                                                         |     |   | length of 400 cm                                                         |                         |           |
| Poplar wood       | Liquid-vapor phase deposition of methyltrimethoxysilane | 153 | 6 | From 153° decreased to 150° with the sandpaper abrasion length of 100 cm | Coating                 | 7         |
| Radiata pine wood | Grafting long-chain stearyl chloride                    | 138 | - | 137° in internal surface                                                 | Bulk highly hydrophobic | 8         |
| Poplar wood       | ZnO rods modified by palmitoyl chloride                 | 155 | 3 | 151° in internal surface                                                 | Bulk superhydrophobic   | 9         |
| Poplar wood       | Porous PDVB                                             | 156 | 3 | 151° in internal surface                                                 | Bulk superhydrophobic   | This work |

1. Jia S, Liu M, Wu Y, et al. Facile and scalable preparation of highly wear-resistance superhydrophobic surface on wood substrates using silica nanoparticles modified by VTES. *Applied Surface Science*, 2016, 386: 115-124.
2. Jia S, Chen H, Luo S, et al. One-step approach to prepare superhydrophobic wood with enhanced mechanical and chemical durability: Driving of alkali. *Applied Surface Science*, 2018, 455: 115-122.
3. Xu L, Zhang H, Zheng C, et al. Enhancing the durability of reversible wettability on larch wood surfaces through optimized pretreatment methods. *Industrial Crops and Products*, 2024, 209: 118045.
4. Zhan K, Lu Q, Xia S, et al. A cost effective strategy to fabricate STA@PF@Cu<sub>2</sub>O hierarchical structure on wood surface: Aimed at superhydrophobic modification. *Wood Science and Technology*, 2021, 55: 565-583.
5. Cao S, Cheng S, Wang P, et al. Construction and characterization of superhydrophobic wood

coatings using one-step technique. *Colloid and Interface Science Communications*, 2023, 57: 100757.

6. Lu Q, Cheng R, Jiang H, et al. Superhydrophobic wood fabricated by epoxy/Cu<sub>2</sub>(OH)<sub>3</sub>Cl NPs/stearic acid with performance of desirable self-cleaning, anti-mold, dimensional stability, mechanical and chemical durability. *Colloids and Surfaces A: Physicochemical and Engineering Aspects*, 2022, 647: 129162.
7. Tang W, Jian Y, Shao M, et al. A novel two-step strategy to construct multifunctional superhydrophobic wood by liquid-vapor phase deposition of methyltrimethoxysilane for improving moisture resistance, anti-corrosion and mechanical strength. *Colloids and Surfaces A: Physicochemical and Engineering Aspects*, 2023, 666: 131314.
8. Wang K, Dong Y, Yan Y, et al. Preparation of mechanical abrasion and corrosion resistant bulk highly hydrophobic material based on 3-D wood template. *RSC advances*, 2016, 6(100): 98248-98256.
9. Tan Y, Wang K, Dong Y, et al. Bulk superhydrophobicity of wood via in-situ deposition of ZnO rods in wood structure. *Surface and Coatings Technology*, 2020, 383: 125240.

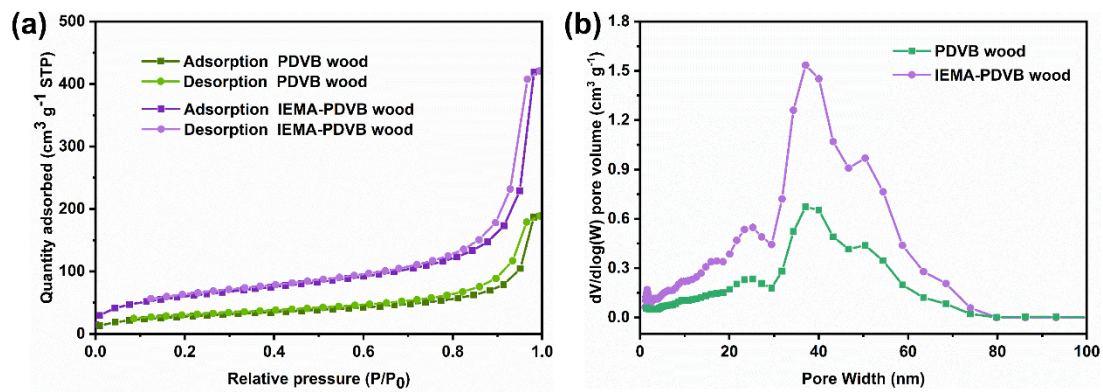

Fig. S1. (a)  $\text{N}_2$  adsorption and desorption isotherms of PDVB wood and IEMA-PDVB wood; (b) Pore width distributions of PDVB wood and IEMA-PDVB wood.
